# Supplementary material
Source: PubMed Central journal article supplement (PMC5716926)
Supplement: NIHMS910491-supplement-1.pdf [file NIHMS910491-supplement-1.pdf]

# Supplementary Figure S1

**A**

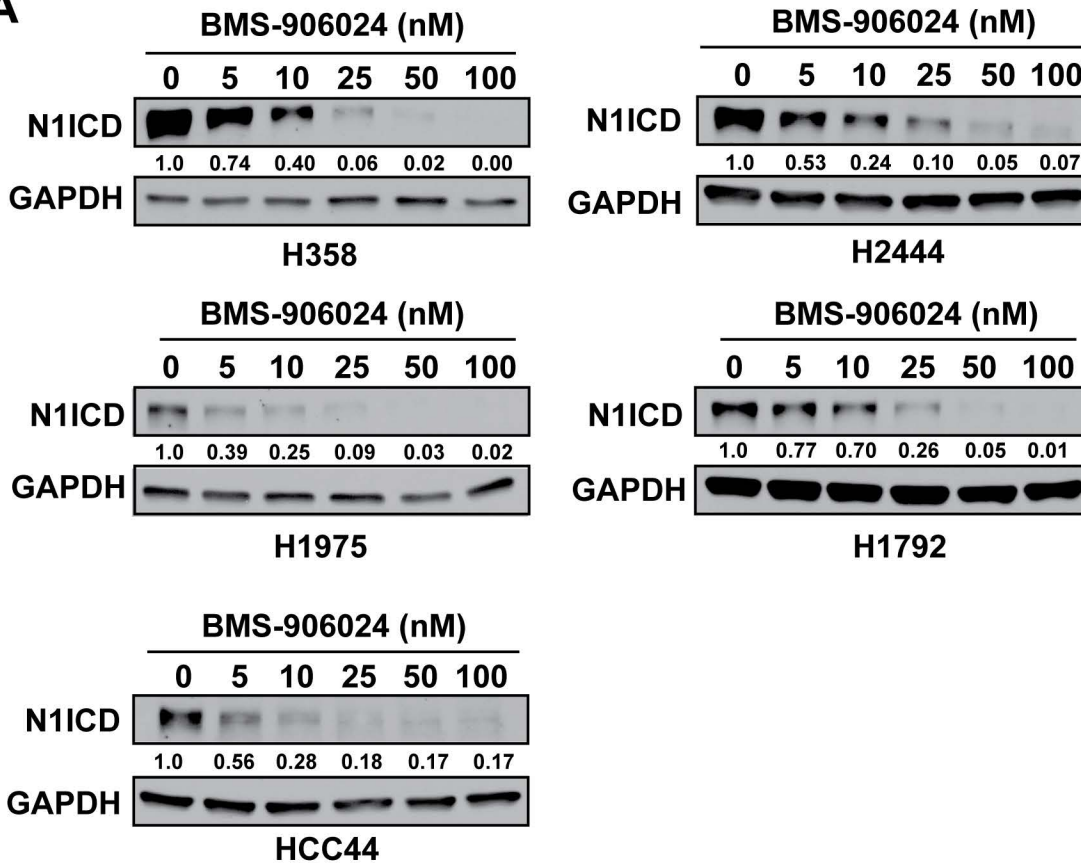

**B**

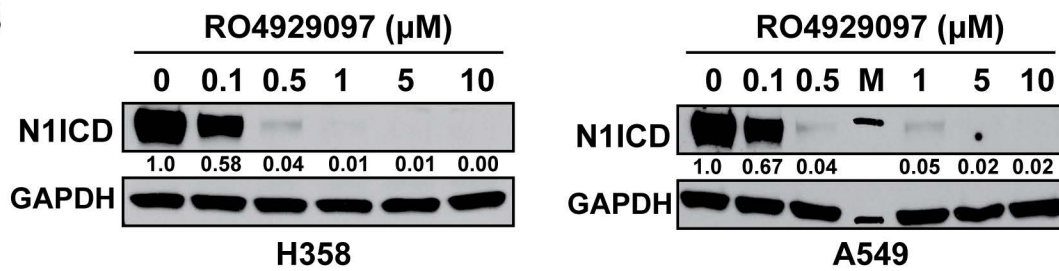

### **Supplementary Figure S1.**

Comparison of Notch inhibition between the gamma secretase inhibitors BMS-906024 and RO4929097. **A**, BMS-906024 treatment of NSCLC cell lines for 72 hrs decreases levels of Notch1 intracellular domain (N1ICD), with 50 – 100 nM being the optimal concentration to maximally inhibit activated N1ICD formation. The change in N1ICD protein levels relative to the untreated cells (0 nM) and normalized to GAPDH is indicated below the immunoblot. **B**, RO4929097 treatment of NSCLC cell lines for 72 hrs decreases levels of N1ICD, with 0.5 – 1  $\mu$ M being the optimal concentration to maximally inhibit activated N1ICD formation. The change in N1ICD protein levels relative to the untreated cells (0  $\mu$ M) and normalized to GAPDH is indicated below the immunoblot. M, protein ladder marker.

### Supplementary Figure S1.

Comparison of Notch inhibition between the gamma secretase inhibitors BMS-906024 and RO4929097. **A**, BMS-906024 treatment of NSCLC cell lines for 72 hrs decreases levels of Notch1 intracellular domain (N1ICD), with 50 – 100 nM being the optimal concentration to maximally inhibit activated N1ICD formation. The change in N1ICD protein levels relative to the untreated cells (0 nM) and normalized to GAPDH is indicated below the immunoblot. **B**, RO4929097 treatment of NSCLC cell lines for 72 hrs decreases levels of N1ICD, with 0.5 – 1  $\mu$ M being the optimal concentration to maximally inhibit activated N1ICD formation. The change in N1ICD protein levels relative to the untreated cells (0  $\mu$ M) and normalized to GAPDH is indicated below the immunoblot. M, protein ladder marker.
