# Supplementary material
Source: PubMed Central journal article supplement (PMC5716926)
Supplement: NIHMS910491-supplement-6.pdf [file NIHMS910491-supplement-6.pdf]

# Supplementary Figure S6

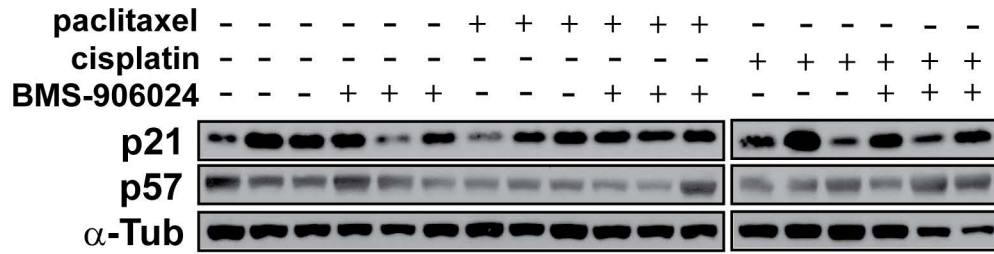

### **Supplementary Figure S6.**

Mechanisms of enhanced paclitaxel-induced apoptosis and proliferation inhibition by BMS-906024. **A**, western blot of p21 and p57 protein levels from HCC44 xenografts harvested after one round of treatment ( $\alpha$ -Tub =  $\alpha$ -tubulin).
